# Supplementary material for: A remote computing based point-of-care colorimetric detection system with a smartphone under complex ambient light conditions
Source: Royal Society of Chemistry journal article supplement (doi:10.1039/c7an01685a), 2018-01-01
Supplement: c7an01685a1.pdf [file c7an01685a1.pdf]

## SUPPLEMENTARY INFORMATION

### Remote computing based Point-of-care colorimetric detection system with smartphone in complex ambient light conditions

Xu Bao<sup>a\*</sup>, Shu Jiang<sup>a</sup>, Yun Wang<sup>b</sup>, Miao Yu<sup>b</sup> and Juan Han<sup>c</sup>

a. School of Computer and Communications Engineering, Jiangsu University, Zhenjiang 212013, PR China. Email: xbao@ujs.edu.cn

b. School of Chemistry and Chemical Engineering, Jiangsu University, Zhenjiang 212013, PR China.

c. School of Food and Biological Engineering, Jiangsu University, Zhenjiang 212013, PR China.

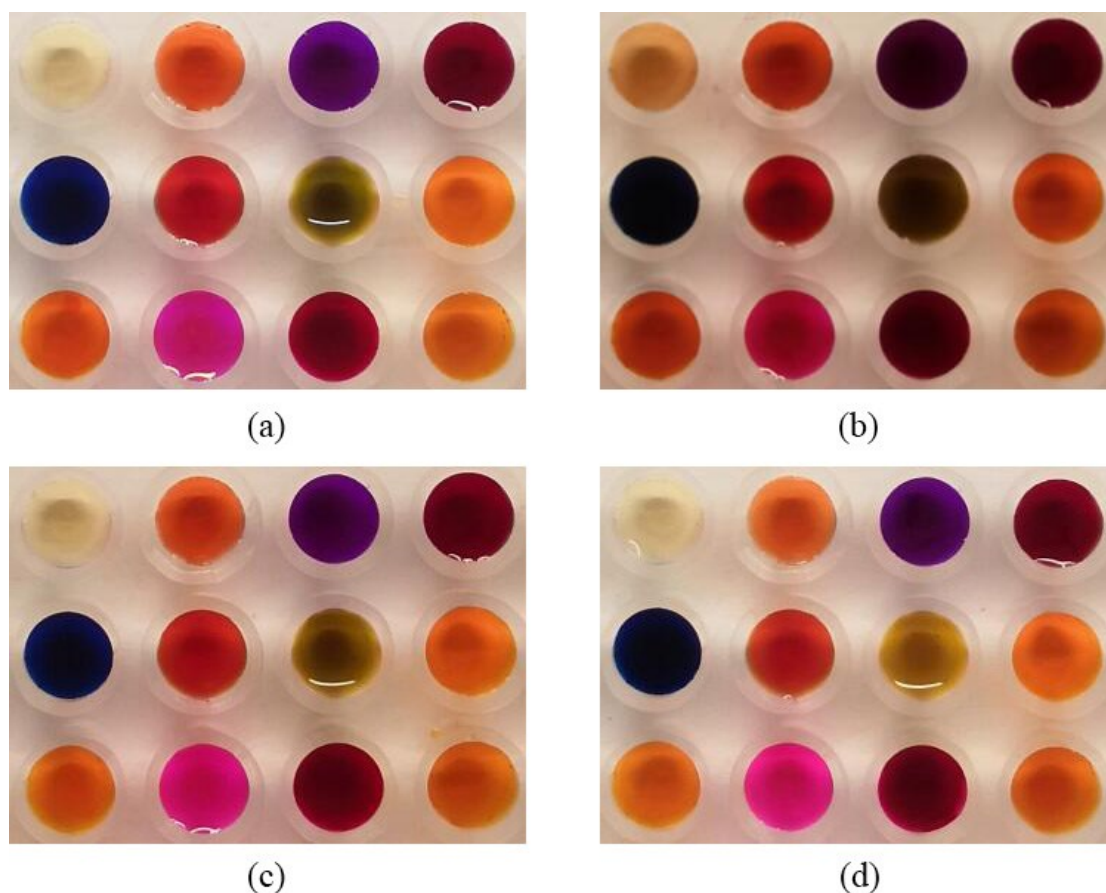

Fig. S1 Images after reaction of 4 different catechols (25mM): (a) 4-methylcatechol (b) 1,2,4-benzenetriol (c) Catechol (d) Dopamine hydrochloride.

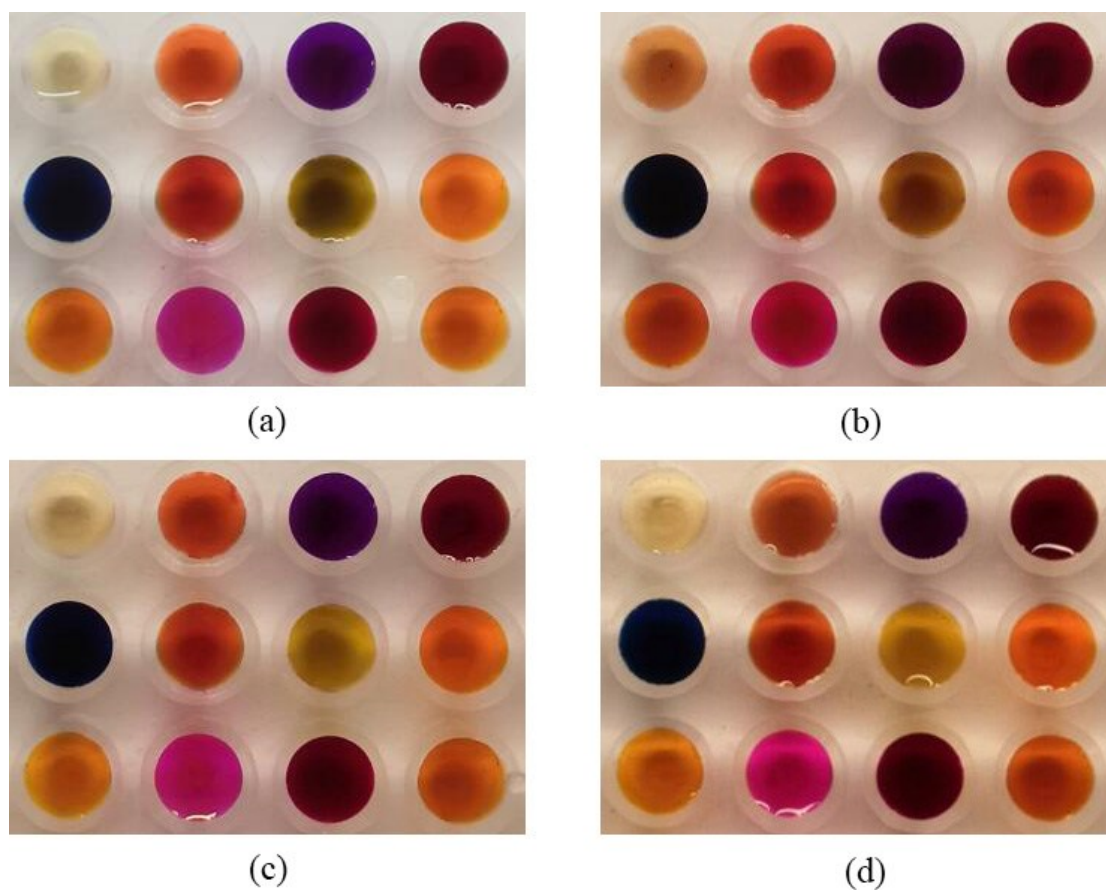

Fig. S2 Images after reaction of 4 different catechols (50mM): (a) 4-methylcatechol (b) 1,2,4-benzenetriol (c) Catechol (d) Dopamine hydrochloride.

**Table S1** Calibration formulas of probe color calibration (25mM)

| Serial number of the probe | Calibration formula | $R^2$ |
|----------------------------|---------------------|-------|
| 1                          | $y=1.263x-31.297$   | 0.921 |
| 2                          | $y=0.956x+2.187$    | 0.949 |
| 3                          | $y=0.783x+3.645$    | 0.819 |
| 4                          | $y=0.818x-2.388$    | 0.899 |
| 5                          | $y=0.69x+5.898$     | 0.615 |
| 6                          | $y=0.967x-7.686$    | 0.937 |
| 7                          | $y=0.911x-4.092$    | 0.908 |
| 8                          | $y=0.992x-1.524$    | 0.962 |
| 9                          | $y=0.966x-4.609$    | 0.951 |
| 10                         | $y=0.887x-4.104$    | 0.937 |
| 11                         | $y=0.74x-1.19$      | 0.895 |
| 12                         | $y=0.979x-2.861$    | 0.964 |

**Table S2** Calibration formulas of probe color calibration (50mM)

| Serial number of the probe | Calibration formula | $R^2$ |
|----------------------------|---------------------|-------|
| 1                          | $y=0.952x+5.971$    | 0.861 |
| 2                          | $y=0.83x+2.048$     | 0.952 |
| 3                          | $y=0.421x+5.068$    | 0.714 |
| 4                          | $y=0.587x-0.658$    | 0.838 |
| 5                          | $y=0.669x+2.681$    | 0.738 |
| 6                          | $y=0.812x-4.806$    | 0.973 |
| 7                          | $y=0.788x+4.412$    | 0.969 |
| 8                          | $y=0.896x+4.297$    | 0.975 |
| 9                          | $y=0.843x+2.959$    | 0.982 |
| 10                         | $y=0.738x-2.084$    | 0.966 |
| 11                         | $y=0.514x+0.269$    | 0.865 |
| 12                         | $y=0.861x+1.054$    | 0.958 |

**Table S3** Classification accuracies after probe color calibration (25mM)

| Analyte combination                                              | Accuracy |
|------------------------------------------------------------------|----------|
| 4-methylcatechol<br>1,2,4-benzenetriol<br>Catechol               | 63.75%   |
| Dopamine hydrochloride                                           |          |
| 4-methylcatechol<br>1,2,4-benzenetriol<br>Catechol               | 68.3%    |
| 4-methylcatechol<br>1,2,4-benzenetriol<br>Dopamine hydrochloride | 91.7%    |
| 4-methylcatechol<br>Catechol<br>Dopamine hydrochloride           | 66.7%    |
| 1,2,4-benzenetriol<br>Catechol<br>Dopamine hydrochloride         | 68.3%    |

**Table S4** Classification accuracies after probe color calibration (50mM)

| Analyte combination                                                          | Accuracy |
|------------------------------------------------------------------------------|----------|
| 4-methylcatechol<br>1,2,4-benzenetriol<br>Catechol<br>Dopamine hydrochloride | 66.7%    |
| 4-methylcatechol<br>1,2,4-benzenetriol<br>Catechol                           | 63.3%    |
| 4-methylcatechol<br>1,2,4-benzenetriol<br>Dopamine hydrochloride             | 100%     |
| 4-methylcatechol<br>Catechol<br>Dopamine hydrochloride                       | 66.7%    |
| 1,2,4-benzenetriol<br>Catechol<br>Dopamine hydrochloride                     | 76.7%    |

**Table S5** Classification accuracies in complex ambient light condition and after probe color calibration in terms of different probes combinations of 4-methylcatechol, 1,2,4-benzenetriol, Catechol and Dopamine hydrochloride (100mM, combination a).

| Classification accuracies in complex ambient light condition | Classification accuracies after probe color calibration | Sequence number of probes combination |
|--------------------------------------------------------------|---------------------------------------------------------|---------------------------------------|
| 30%                                                          | 43.5%                                                   | 2                                     |
| 63%                                                          | 74%                                                     | 2,6                                   |
| 70.5%                                                        | 73%                                                     | 2,6,11                                |
| 70.5%                                                        | 77%                                                     | 2,6,11,3*                             |
| 72%                                                          | 76.5%                                                   | 2,6,11,3,10                           |
| 74%                                                          | 75.5%                                                   | 2,6,11,3,10,9                         |
| 66.5%                                                        | 75.5%                                                   | 2,6,11,3,10,9,1                       |
| 65.5%                                                        | 74.5%                                                   | 2,6,11,3,10,9,1,4                     |
| 66%                                                          | 72%                                                     | 2,6,11,3,10,9,1,4,7                   |
| 65%                                                          | 71.5%                                                   | 2,6,11,3,10,9,1,4,7,12                |
| 65.5%                                                        | 73.5%                                                   | 2,6,11,3,10,9,1,4,7,12,8              |
| 60%                                                          | 74.5%                                                   | 2,6,11,3,10,9,1,4,7,12,8,5            |

**Table S6** Classification accuracies in complex ambient light condition and after probe color calibration in terms of different probes combinations of 1,2,4-benzenetriol, Catechol and Dopamine hydrochloride (100mM, combination b).

| Classification accuracies in complex ambient light condition | Classification accuracies after probe color calibration | Sequence number of probes combination |
|--------------------------------------------------------------|---------------------------------------------------------|---------------------------------------|
| 78.6%                                                        | 92.7%                                                   | 2                                     |
| 86.7%                                                        | 96.7%                                                   | 2,6*                                  |
| 87.3%                                                        | 93.3%                                                   | 2,6,11                                |
| 86.7%                                                        | 93.3%                                                   | 2,6,11,3                              |
| 86.7%                                                        | 91.3%                                                   | 2,6,11,3,10                           |
| 90.7%                                                        | 92.7%                                                   | 2,6,11,3,10,9                         |
| 83.3%                                                        | 87.3%                                                   | 2,6,11,3,10,9,1                       |
| 82.7%                                                        | 87.3%                                                   | 2,6,11,3,10,9,1,4                     |
| 82.7%                                                        | 88%                                                     | 2,6,11,3,10,9,1,4,7                   |
| 81.3%                                                        | 84.7%                                                   | 2,6,11,3,10,9,1,4,7,12                |
| 81.3%                                                        | 84.7%                                                   | 2,6,11,3,10,9,1,4,7,12,8              |
| 82.7%                                                        | 84.7%                                                   | 2,6,11,3,10,9,1,4,7,12,8,5            |

**Table S7** Classification accuracies in complex ambient light condition and after probe color calibration in terms of different probes combinations of 4-methylcatechol, Catechol and Dopamine hydrochloride (100mM, combination c).

| Classification accuracies in complex ambient light condition | Classification accuracies after probe color calibration | Sequence number of probes combination |
|--------------------------------------------------------------|---------------------------------------------------------|---------------------------------------|
| 33%                                                          | 35.3%                                                   | 2                                     |
| 70%                                                          | 72.6%                                                   | 2,6                                   |
| 70.7%                                                        | 68%                                                     | 2,6,11                                |
| 70.7%                                                        | 74%                                                     | 2,6,11,3                              |
| 72%                                                          | 77.3%                                                   | 2,6,11,3,10*                          |
| 72.7%                                                        | 76%                                                     | 2,6,11,3,10,9                         |
| 62.7%                                                        | 76.7%                                                   | 2,6,11,3,10,9,1                       |
| 62%                                                          | 75.3%                                                   | 2,6,11,3,10,9,1,4                     |
| 61.3%                                                        | 72%                                                     | 2,6,11,3,10,9,1,4,7                   |
| 59.3%                                                        | 70%                                                     | 2,6,11,3,10,9,1,4,7,12                |
| 60%                                                          | 72%                                                     | 2,6,11,3,10,9,1,4,7,12,8              |
| 60%                                                          | 73.3%                                                   | 2,6,11,3,10,9,1,4,7,12,8,5            |

**Table S8** Classification accuracies in complex ambient light condition and after probe color calibration in terms of different probes combinations of 4-methylcatechol, 1,2,4-benzenetriol and Dopamine hydrochloride (100mM, combination d).

| Classification accuracies in complex ambient light condition | Classification accuracies after probe color calibration | Sequence number of probes combination |
|--------------------------------------------------------------|---------------------------------------------------------|---------------------------------------|
| 78%                                                          | 92.7%                                                   | 2                                     |
| 79.3%                                                        | 91.3%                                                   | 2,6                                   |
| 87.3%                                                        | 94%                                                     | 2,6,11*                               |
| 86.7%                                                        | 93.3%                                                   | 2,6,11,3                              |
| 90.7%                                                        | 89.3%                                                   | 2,6,11,3,10                           |
| 88.7%                                                        | 90.7%                                                   | 2,6,11,3,10,9                         |
| 81.3%                                                        | 90%                                                     | 2,6,11,3,10,9,1                       |
| 80.7%                                                        | 90%                                                     | 2,6,11,3,10,9,1,4                     |
| 82%                                                          | 90%                                                     | 2,6,11,3,10,9,1,4,7                   |
| 82.7%                                                        | 91.3%                                                   | 2,6,11,3,10,9,1,4,7,12                |
| 83.3%                                                        | 90.7%                                                   | 2,6,11,3,10,9,1,4,7,12,8              |
| 83.3%                                                        | 90.7%                                                   | 2,6,11,3,10,9,1,4,7,12,8,5            |

**Table S9** Classification accuracies in complex ambient light condition and after probe color calibration in terms of different probes combinations of 4-methylcatechol, 1,2,4-benzenetriol and Catechol (100mM, combination e).

| Classification accuracies in complex ambient light condition | Classification accuracies after probe color calibration | Sequence number of probes combination |
|--------------------------------------------------------------|---------------------------------------------------------|---------------------------------------|
| 39.3%                                                        | 55.3%                                                   | 2                                     |
| 56%                                                          | 66.7%                                                   | 2,6                                   |
| 66%                                                          | 68.7%                                                   | 2,6,11                                |
| 66%                                                          | 74%                                                     | 2,6,11,3                              |
| 67.3%                                                        | 75.3%                                                   | 2,6,11,3,10                           |
| 70.7%                                                        | 74%                                                     | 2,6,11,3,10,9                         |
| 68%                                                          | 74%                                                     | 2,6,11,3,10,9,1                       |
| 67.3%                                                        | 72.7%                                                   | 2,6,11,3,10,9,1,4                     |
| 66.7%                                                        | 69.3%                                                   | 2,6,11,3,10,9,1,4,7                   |
| 66.7%                                                        | 72.7%                                                   | 2,6,11,3,10,9,1,4,7,12                |
| 66.7%                                                        | 75.3%                                                   | 2,6,11,3,10,9,1,4,7,12,8              |
| 67.3%                                                        | 76.7%                                                   | 2,6,11,3,10,9,1,4,7,12,8,5*           |

**Table S10** Compression ratio of probes array number of different analytes combinations

| Combination | Original number of probes array | Optimal number of probes array | Compression ratio of probes array number |
|-------------|---------------------------------|--------------------------------|------------------------------------------|
| a           | 12                              | 4                              | 66.7%                                    |
| b           | 12                              | 2                              | 83.3%                                    |
| c           | 12                              | 5                              | 58.3                                     |
| d           | 12                              | 3                              | 75%                                      |
| e           | 12                              | 12                             | 0%                                       |
